# Supplementary material for: Expression Profiling of Strawberry Allergen Fra a during Fruit Ripening Controlled by Exogenous Auxin
Source: PubMed Central journal article supplement (PMC5486009; doi:10.3390/ijms18061186), 2017-06-02
Supplement: ijms-18-01186-s001.pdf [file ijms-18-01186-s001.pdf]

# Expression Profiling of Strawberry Allergen Fra a during Fruit Ripening Controlled by Exogenous Auxin

Misaki Ishibashi, Hiroki Yoshikawa and Yuichi Uno

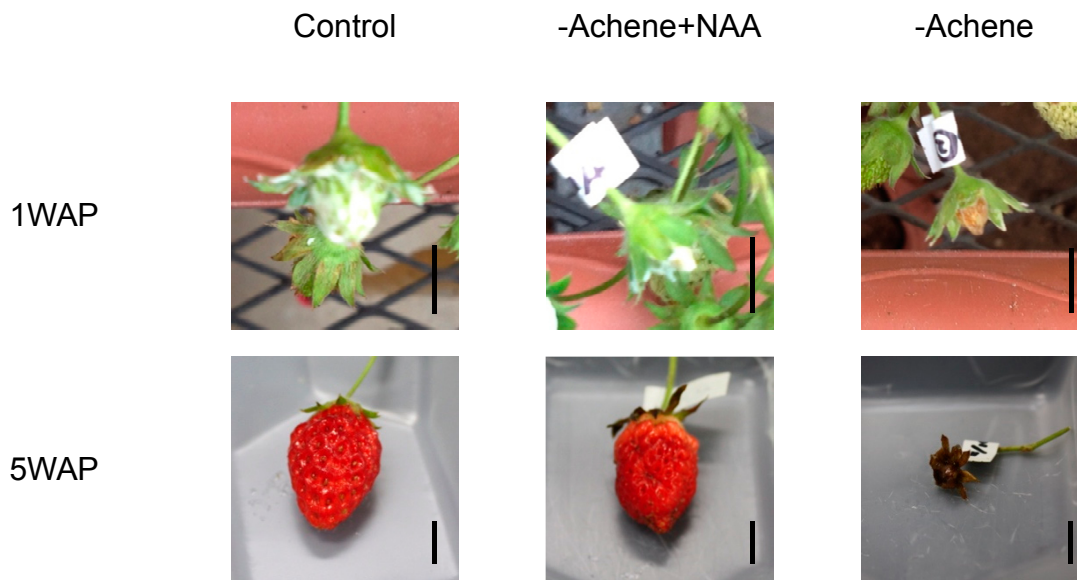

**Figure S1.** Development of strawberry (*Fragaria × ananassa* cv. 'Akihime') fruit in response to pre-harvest treatment with auxin. Strawberry plants were grown in containers in a glasshouse. Approximate number of weeks after artificial pollination (WAP) is shown on the left of the photographs. The surface of the fruit was pasted with lanolin emulsion at the small green stage. The lanolin emulsion contained solvent alone (Control). Achenes were removed and pasted 3000  $\mu$ M 1-naphthaleneacetic acid (-Achene+NAA) or lanolin solvent alone (-Achene). Scale bar represents 1.0 cm.

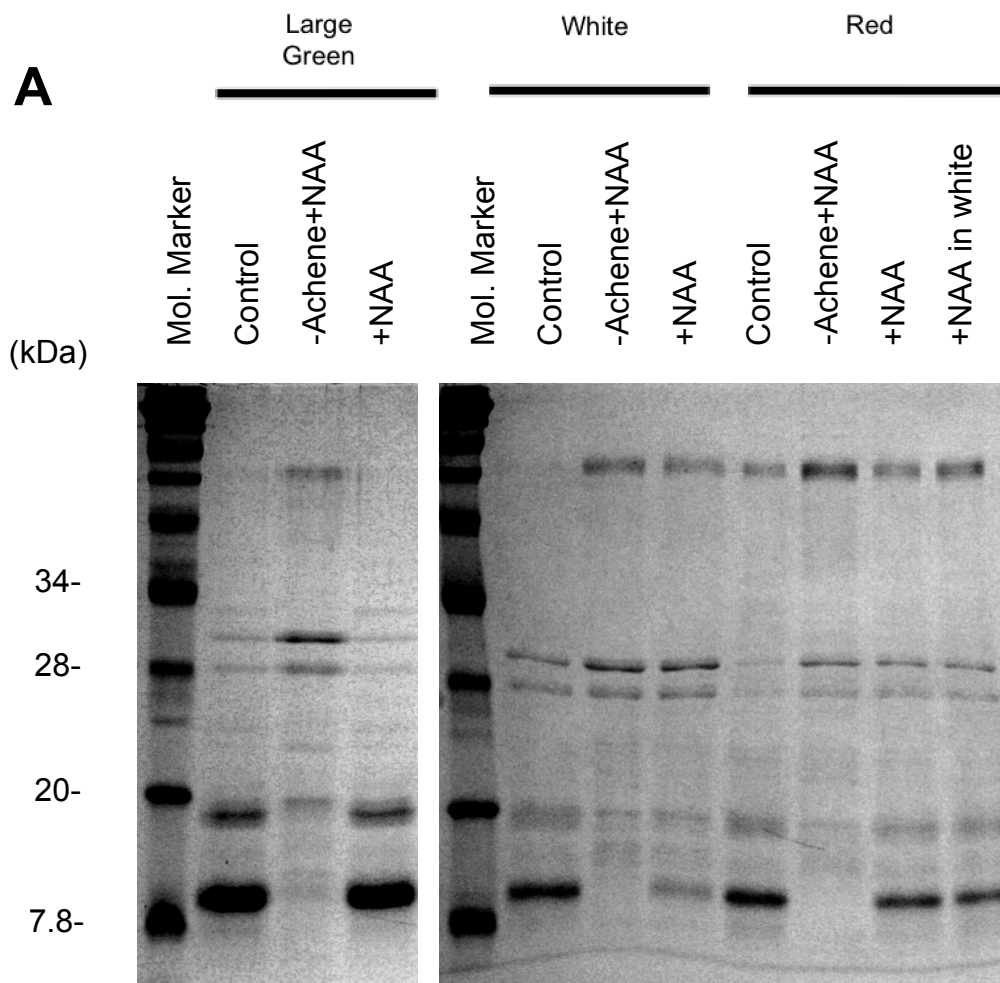

**Figure S2A.** Each profile of protein in strawberry fruit (*Fragaria × ananassa* cv. 'Akihime'). Culture and pre-harvest treatments were performed as described in Figure 1. Protein extraction was performed as described in Figure 2. 2µg protein was separated by SDS-PAGE with 15% acrylamide gels, and stained with Coomassie brilliant blue solution (Nacalai Tesque).

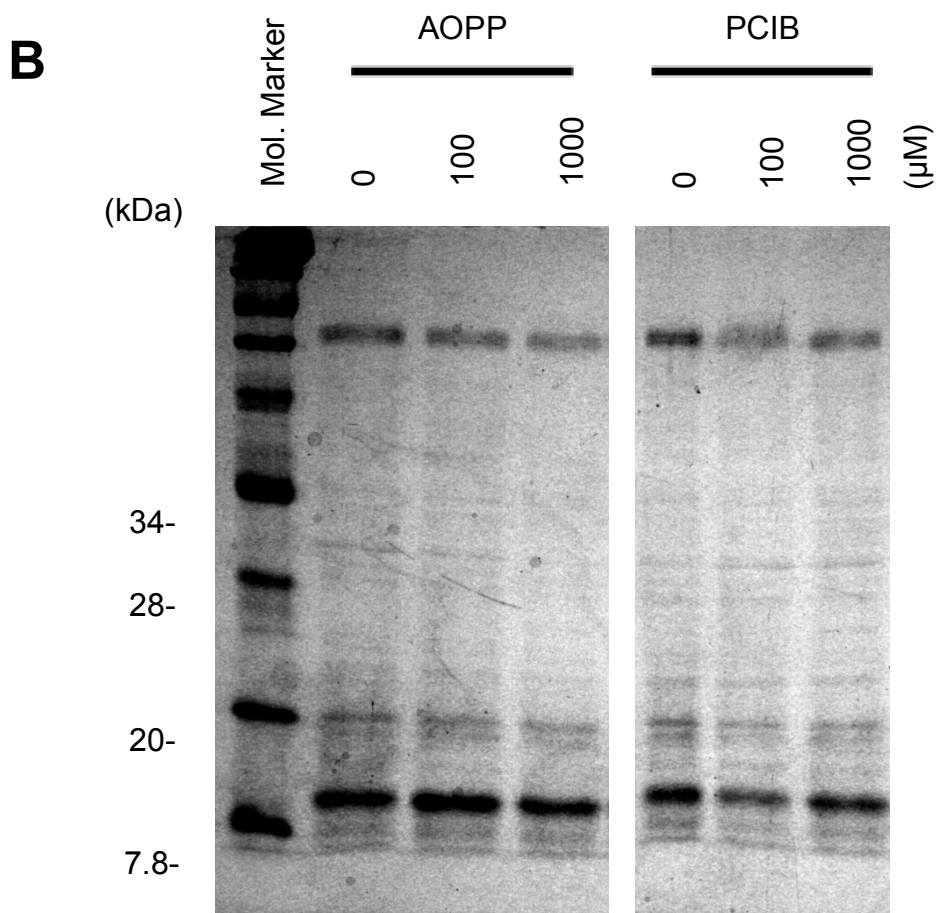

**Figure S2B.** Each profile of protein in strawberry fruit (*Fragaria × ananassa* cv. 'Akihime'). Culture and pre-harvest treatments were performed as described in Figure 3. Protein extraction was performed as described in Figure 4. 2 $\mu\text{g}$  protein was separated by SDS-PAGE with 15% acrylamide gels, and stained with Coomassie brilliant blue solution (Nacalai Tesque).

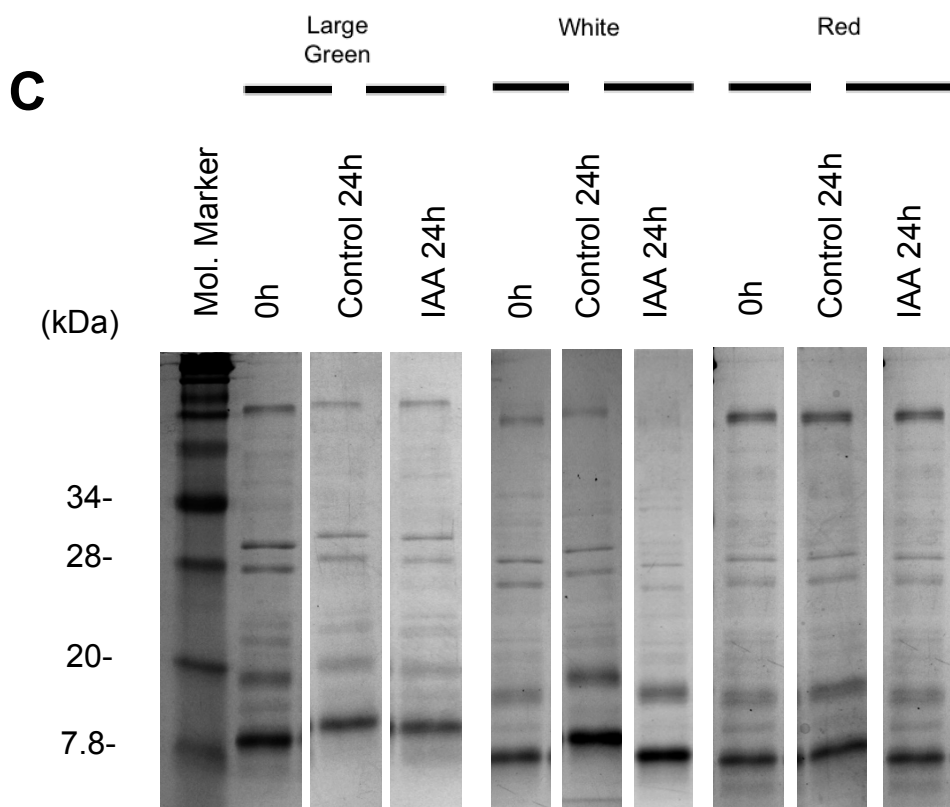

**Figure S2C.** Each profile of protein in strawberry fruit (*Fragaria × ananassa* cv. 'Akihime'). Culture and pre-harvest treatments were performed as described in Figure 5. Protein extraction was performed as described in Figure 5. 2µg protein was separated by SDS-PAGE with 15% acrylamide gels, and stained with Coomassie brilliant blue solution (Nacalai Tesque).

**Table S1.** Primer sequences in real-time PCR.

| Name                      | Sequence                     | Reference |
|---------------------------|------------------------------|-----------|
| <i>Fra a 1</i> -Forward   | CACACCAAGGGAGATGTCG          |           |
| <i>Fra a 1</i> -Reverse   | GGGTGGTCCTTGAGGTATCC         |           |
| <i>Fra a 2</i> -Forward   | ACACCAAAGGTGACGTGGA          |           |
| <i>Fra a 2</i> -Reverse   | ATTAGGATTGGCCAAGAGGTAG       |           |
| <i>FaAux/IAA</i> -Forward | AAAGCGGTGGGATGTTCGTG         |           |
| <i>FaAux/IAA</i> -Reverse | CCTTGAGCAGCTCTGGATATCC       |           |
| <i>EF1α</i> -Forward      | TGGATTTGAGGGTGACAACATGA      | [1]       |
| <i>EF1α</i> -Reverse      | GTATACATCCTGAAGTGGTAGACGGAGG | [1]       |

1. Amil-Ruiz, F.; Garrido-Gala, J.; Blanco-Portales, R.; Folta, K.M.; Muñoz-Blanco, J.; Caballero, J.L. Identification and Validation of Reference Genes for Transcript Normalization in Strawberry (*Fragaria × ananassa*) Defense Responses. *PLoS ONE* **2013**, *8*, e70603.
